# Supplementary material for: Highly sensitive detection of carbon dioxide by a pyrimido[1,2-a]benzimidazole derivative: combining experimental and theoretical studies
Source: Royal Society of Chemistry journal article supplement (doi:10.1039/c5an00947b), 2015-01-01
Supplement: c5an00947b1.pdf [file c5an00947b1.pdf]

Supporting Information For:

**Biomimetic High Sensitive Detection of Carbon  
Dioxide by Pyrimido[1,2-a]benzimidazole derivative:  
Combining Experimental and Theoretical Studies**

Guomin Xia, Chengyan, Ruan, Hongming Wang.

Institute for advanced study, Nanchang University, Nanchang, 330031, China.

## Experimental

### Chemicals and reagents

All commercially available reagents and solvents were purchased from commercial suppliers and used without further purification unless otherwise stated. Absorption spectrometry was performed using Gold S54T spectrophotometer of Lengguang Company, and fluorescence spectrometry was performed using F-7000 FL Spectrophotometer of Hitachi. Melting points were determined in open capillaries.  $^1\text{H}$  NMR and  $^{13}\text{C}$  NMR spectra were recorded with a Bruker AVANCE 500 spectrometer with use of the deuterated solvent as the lock and TMS as an internal reference. Elemental analysis was performed on Elementar Vario vario EL III. Mass spectra were acquired using a triple quadrupole mass spectrometer (6430 QqQLC/MS system; Agilent Technologies, USA) equipped with an orthogonal ESI source. The crystals for X-ray diffraction analyses were grown in dichloromethane by adding n-hexane to slow diffuse. The X-ray diffraction experiment was carried out using Bruker SMART APEX-II Single-crystal diffractometer. Tetrabutylammonium salts ( $\text{F}^-$ ,  $\text{AcO}^-$ ,  $\text{Cl}^-$ ,  $\text{Br}^-$  and  $\text{I}^-$ ) were all >98% pure and the solutions used in titrations were prepared in fresh dry acetonitrile ( $\text{CH}_3\text{CN}$ ).

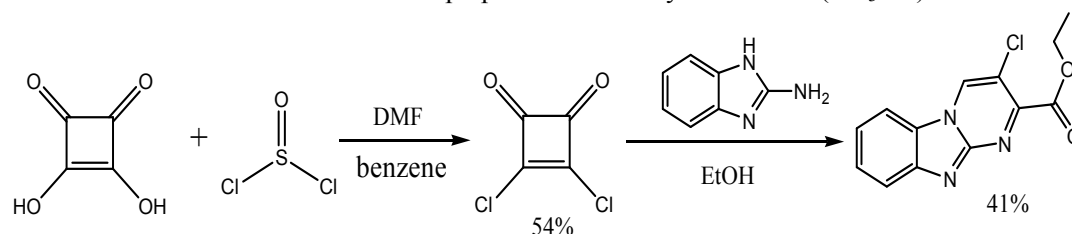

**Scheme S1.** The synthesis of compound **P1H**

### Synthesis of 3,4-Dichlorocyclobutene-1,2-dione

A mixture of squaric acid (1.14 g, 10 mmol), thionyl dichloride (1.8 ml, 20 mmol) and DMF (200ul) in dry benzene (10 ml) was refluxed for 6 h at  $60^\circ\text{C}$ . The solvent was evaporated in vacuo and hexane (20 ml) was added, then the soluble products were separated from gummy precipitates. Concentrating and cooling to give yellow crystalline which was used in the next step without further purification (0.82 g, 5.4mmol), yield 54%<sup>[1]</sup>.

### Synthesis of P1H

A anhydrous ethanol (30ml) solution of 2-aminobenzimidazole (798mg, 6mmol) was added into fresh 3,4-Dichlorocyclobutene-1,2-dione (750mg, 5mmol) under vigorous stirring, and the mixture was stirred at room temperature for 20min. Then the solvent was removed in vacuo and the residue purified on a column (1% methanol in chloroform as eluent) to give P1H in 41% yield (563mg, 2.08mmol) M.P.  $252\text{-}253^\circ\text{C}$ .  $^1\text{H}$  NMR (400 MHz,  $\text{DMSO-d}_6$ ) ppm 10.08 (s, 1H), 8.39 (d,  $J = 8.22$  Hz, 1H), 7.94 (d,  $J = 8.26$  Hz, 1H), 7.70-7.46 (m, 2H), 4.49 (q,  $J = 7.11$  Hz, 2H), 1.46-1.32 (m, 3H).  $^{13}\text{C}$  NMR (400 MHz,  $\text{DMSO-d}_6$ ), 163.35(1C), 152.60(1C), 147.44(1C), 145.28(1C), 137.23(1C), 127.60(1C), 127.38(1C), 123.23(1C), 120.24(1C), 113.93(1C), 110.99(1C), 63.15(1C), 14.45(1C). Anal. Calcd for P1H: C, 56.64; H, 3.66; N, 15.24. Found: C, 56.60; H, 3.70; N, 15.21.

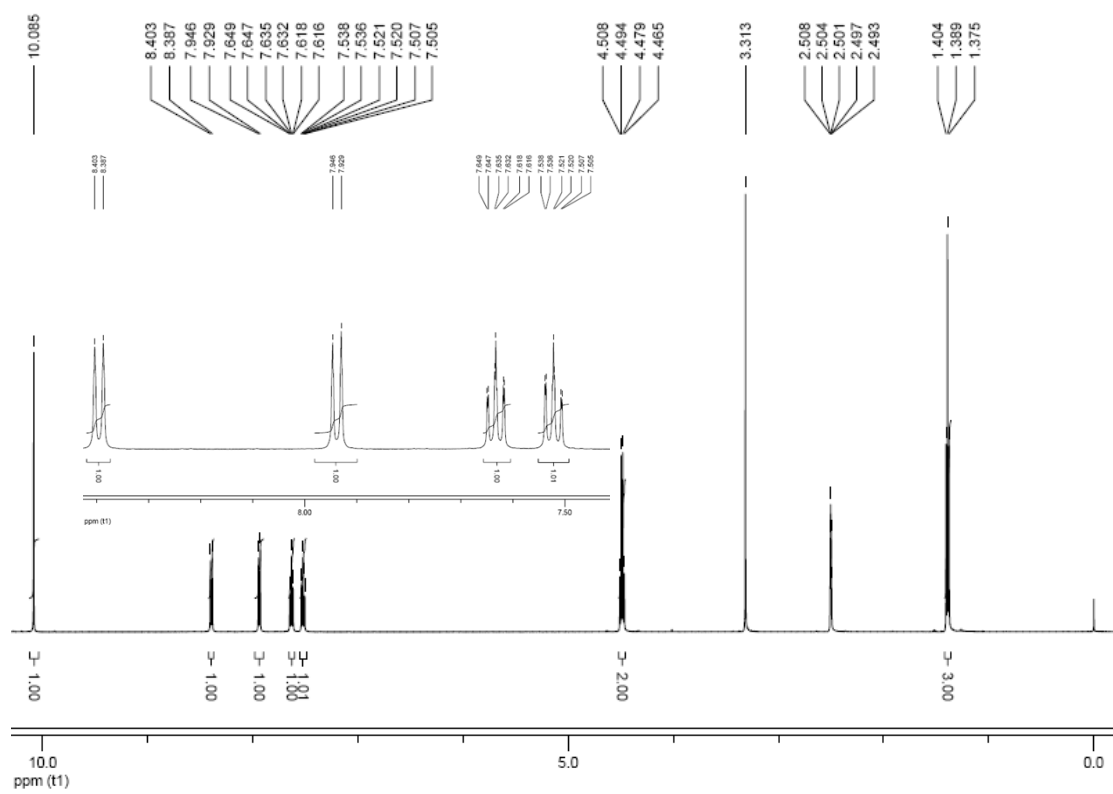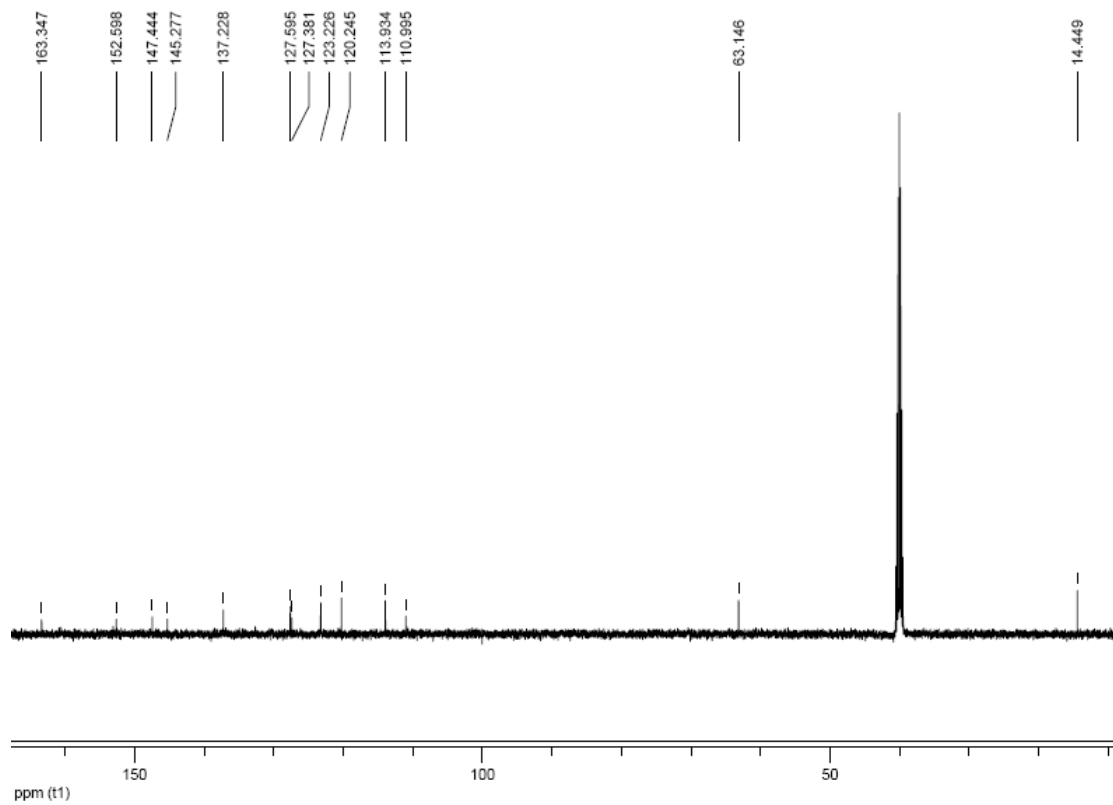

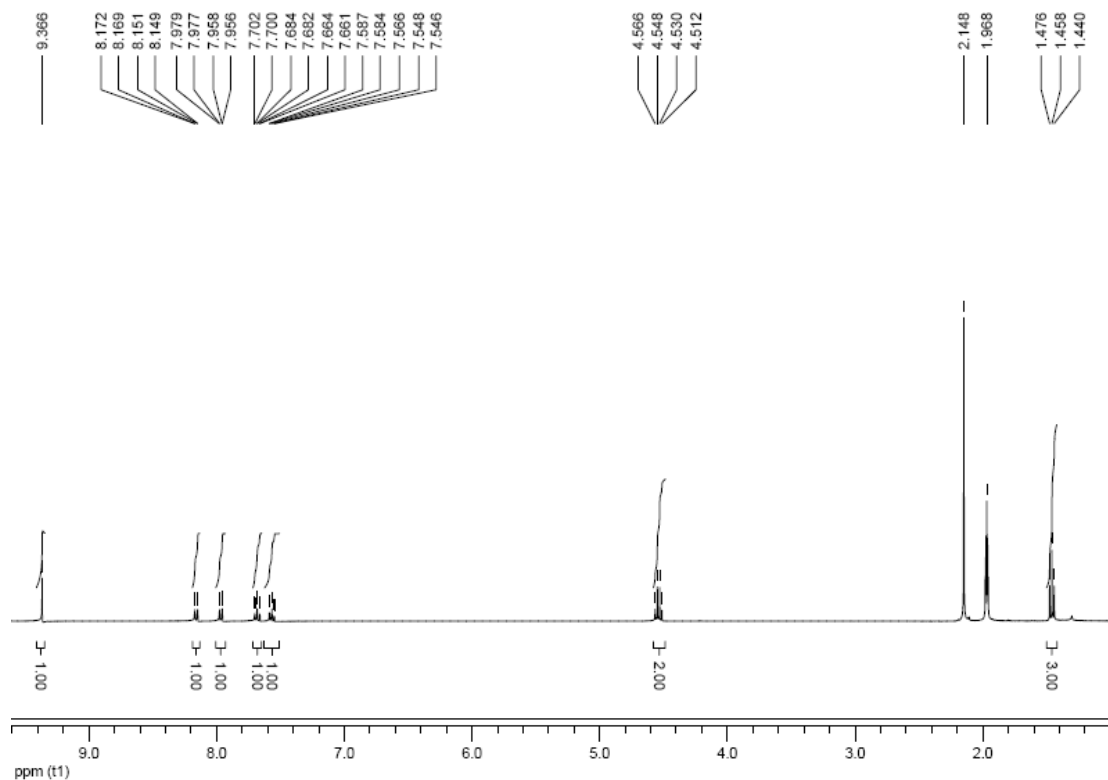

**Figure S1.** (a) The  $^1\text{H}$  and  $^{13}\text{C}$ -NMR of P1H in  $\text{DMSO-d}_6$  and (b) The  $^1\text{H}$ -NMR of P1H in  $\text{CD}_3\text{CN-d}_3$ .

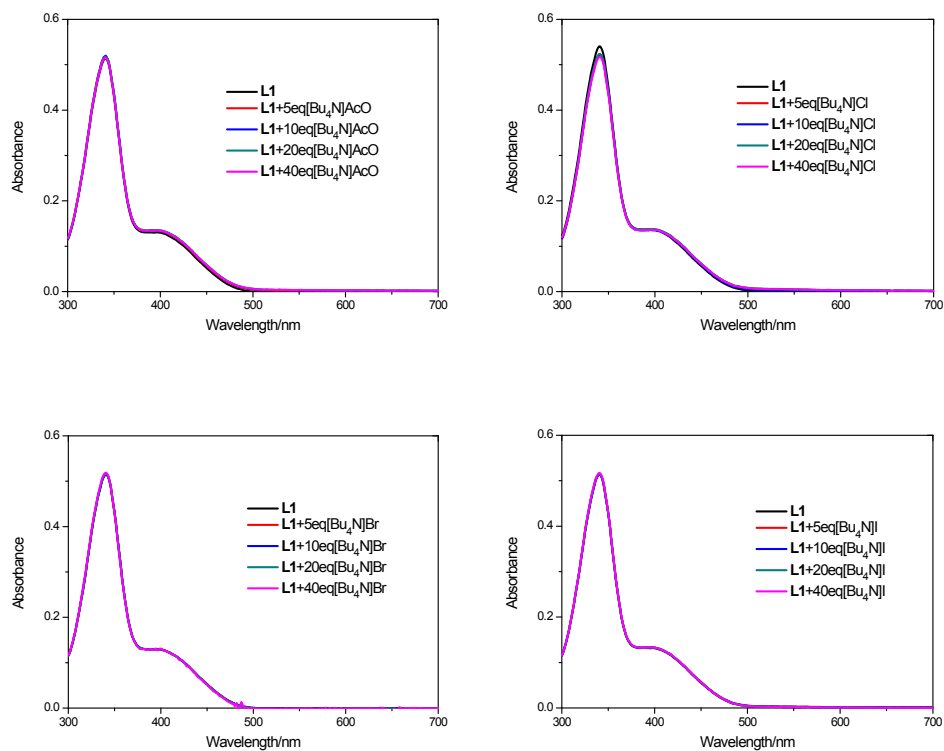

**Figure S2.** UV-vis spectra taken over the course of titration of receptor P1H ( $50\mu\text{M}$ ) with  $[\text{Bu}_4\text{N}]\text{X}$  in  $\text{CH}_3\text{CN}$ .

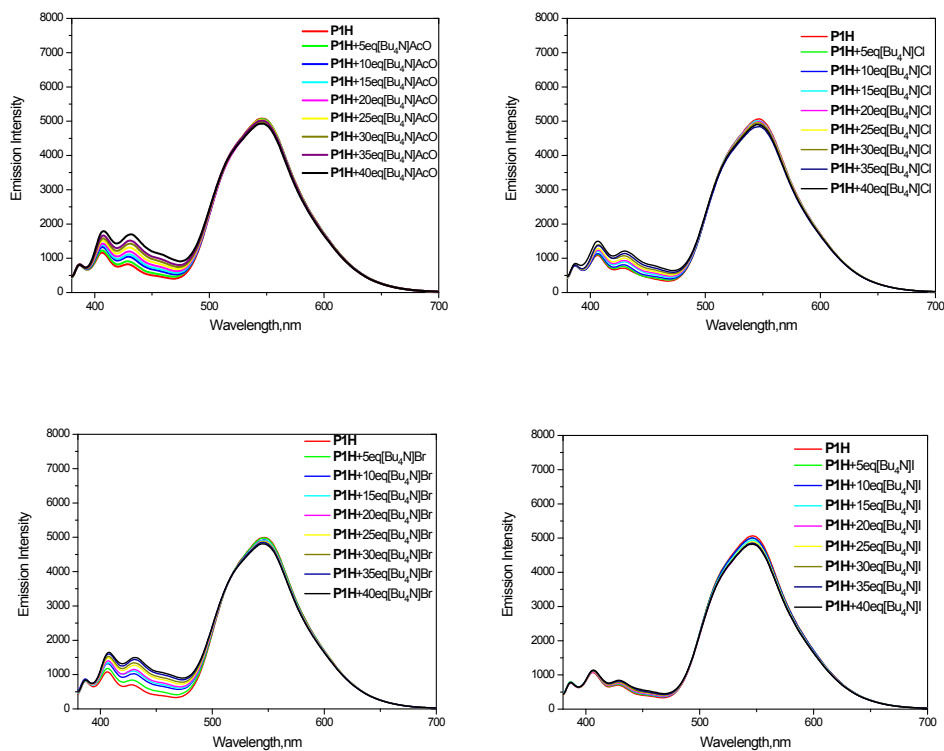

**Figure S3.** Emission spectra taken upon addition of  $[\text{Bu}_4\text{N}]\text{X}$  to P1H (50Mm) in  $\text{CH}_3\text{CN}$ ; excitation wavelength=360 nm.

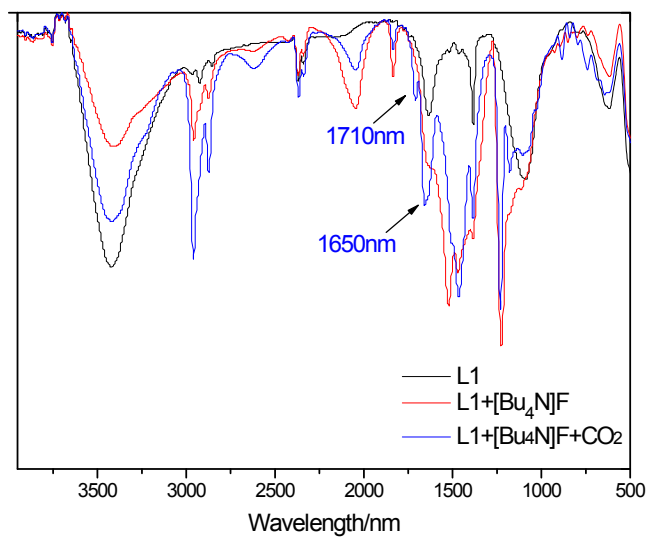

**Figure S4.** IR spectra taken over the course of titration of receptor P1H (4.5mM) with  $[\text{Bu}_4\text{N}]\text{F}$  followed by  $\text{CO}_2$  gas.

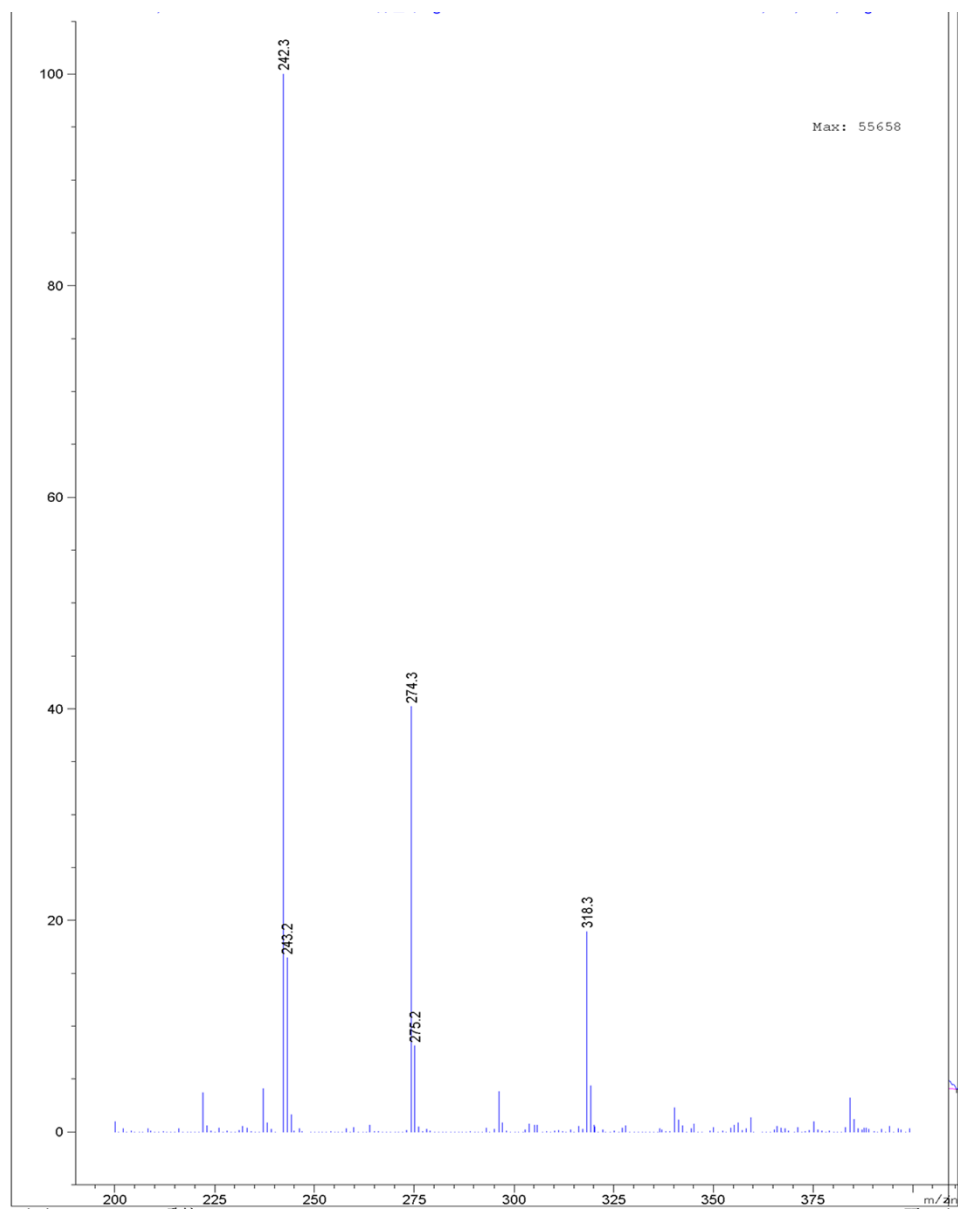

**Figure S5.** Mass spectrum taken upon addition of  $[\text{Bu}_4\text{N}]\text{F}$  to  $\text{P1H}$  in  $\text{CH}_3\text{CN}$  and then bubbling with enough  $\text{CO}_2$ .

**Table S1.** Crystal data and structure refinement for P1H

|                                   |                                                                                                                    |
|-----------------------------------|--------------------------------------------------------------------------------------------------------------------|
| Empirical formula                 | $C_{13}H_{10}ClN_3O_2$                                                                                             |
| Formula weight                    | 275.69                                                                                                             |
| Temperature                       | 296(2) K                                                                                                           |
| Wavelength                        | 0.71073 Å                                                                                                          |
| Crystal system, space group       | Orthorhombic, $Pbc_a$                                                                                              |
| Unit cell dimensions              | $a = 7.240(6)$ Å $\alpha = 90$ deg.<br>$b = 11.439(10)$ Å $\beta = 90$ deg.<br>$c = 29.79(3)$ Å $\gamma = 90$ deg. |
| Volume                            | 2467(4) Å <sup>3</sup>                                                                                             |
| Z, Calculated density             | 8, 1.485 Mg/m <sup>3</sup>                                                                                         |
| Absorption coefficient            | 0.311 mm <sup>-1</sup>                                                                                             |
| F(000)                            | 1136                                                                                                               |
| Crystal size                      | 0.25 x 0.20 x 0.15 mm                                                                                              |
| Theta range for data collection   | 2.74 to 17.19 deg.                                                                                                 |
| Limiting indices                  | $-6 \leq h \leq 5$ , $-9 \leq k \leq 9$ , $-24 \leq l \leq 24$                                                     |
| Reflections collected / unique    | 6405 / 735 [R(int) = 0.0654]                                                                                       |
| Completeness to theta = 17.19     | 99.6 %                                                                                                             |
| Absorption correction             | Semi-empirical from equivalents                                                                                    |
| Max. and min. transmission        | 0.954 and 0.928                                                                                                    |
| Refinement method                 | Full-matrix least-squares on F <sup>2</sup>                                                                        |
| Data / restraints / parameters    | 735 / 0 / 173                                                                                                      |
| Goodness-of-fit on F <sup>2</sup> | 1.019                                                                                                              |
| Final R indices [I > 2σ(I)]       | R1 = 0.0300, wR2 = 0.0756                                                                                          |
| R indices (all data)              | R1 = 0.0435, wR2 = 0.0823                                                                                          |
| Largest diff. peak and hole       | 0.161 and -0.118 e. Å <sup>-3</sup>                                                                                |

**Optimized structure**

## TS1

|    |   |   |           |           |           |
|----|---|---|-----------|-----------|-----------|
| 1  | 6 | 0 | -4.967285 | 0.193614  | 0.358034  |
| 2  | 6 | 0 | -5.230085 | -1.188133 | 0.362676  |
| 3  | 6 | 0 | -4.212208 | -2.112993 | 0.230387  |
| 4  | 6 | 0 | -2.900775 | -1.638527 | 0.091423  |
| 5  | 6 | 0 | -2.660081 | -0.245793 | 0.092002  |
| 6  | 6 | 0 | -3.682197 | 0.693541  | 0.222024  |
| 7  | 1 | 0 | -5.796014 | 0.887015  | 0.462014  |
| 8  | 1 | 0 | -6.254013 | -1.532590 | 0.470798  |
| 9  | 1 | 0 | -4.407590 | -3.179920 | 0.230947  |
| 10 | 1 | 0 | -3.440776 | 1.755646  | 0.210577  |
| 11 | 6 | 0 | -0.797943 | -1.453846 | -0.149401 |

|    |    |   |           |           |           |
|----|----|---|-----------|-----------|-----------|
| 12 | 6  | 0 | 1.320271  | -0.686176 | -0.366428 |
| 13 | 6  | 0 | 0.877610  | 0.654209  | -0.302683 |
| 14 | 6  | 0 | -0.456466 | 0.968323  | -0.148680 |
| 15 | 1  | 0 | -0.682784 | 2.285109  | -0.056429 |
| 16 | 7  | 0 | -1.747007 | -2.359377 | -0.057160 |
| 17 | 7  | 0 | -1.276777 | -0.124022 | -0.063376 |
| 18 | 7  | 0 | 0.506998  | -1.711407 | -0.308683 |
| 19 | 6  | 0 | 2.769458  | -1.069803 | -0.537807 |
| 20 | 8  | 0 | 3.171002  | -1.732434 | -1.459731 |
| 21 | 8  | 0 | 3.513817  | -0.634761 | 0.468065  |
| 22 | 6  | 0 | 4.921374  | -0.951491 | 0.406488  |
| 23 | 6  | 0 | 5.572321  | -0.360037 | 1.628594  |
| 24 | 1  | 0 | 5.326487  | -0.535426 | -0.519275 |
| 25 | 1  | 0 | 5.029731  | -2.038120 | 0.367597  |
| 26 | 1  | 0 | 6.642138  | -0.582117 | 1.615413  |
| 27 | 1  | 0 | 5.446739  | 0.724784  | 1.652035  |
| 28 | 1  | 0 | 5.145438  | -0.782336 | 2.541189  |
| 29 | 17 | 0 | 2.057969  | 1.924578  | -0.493555 |
| 30 | 9  | 0 | -2.167548 | 3.263479  | 0.095399  |
| 31 | 9  | 0 | -0.185768 | 3.599185  | 0.019451  |

## TS2

|    |   |   |           |           |           |
|----|---|---|-----------|-----------|-----------|
| 1  | 6 | 0 | 4.918021  | 0.071361  | 0.244433  |
| 2  | 6 | 0 | 5.164892  | -1.306799 | 0.373847  |
| 3  | 6 | 0 | 4.139663  | -2.235798 | 0.324035  |
| 4  | 6 | 0 | 2.829993  | -1.770948 | 0.146088  |
| 5  | 6 | 0 | 2.605272  | -0.382064 | 0.030795  |
| 6  | 6 | 0 | 3.630432  | 0.555055  | 0.067834  |
| 7  | 1 | 0 | 5.749552  | 0.767010  | 0.278988  |
| 8  | 1 | 0 | 6.186156  | -1.647795 | 0.510708  |
| 9  | 1 | 0 | 4.333950  | -3.299056 | 0.416636  |
| 10 | 1 | 0 | 3.431415  | 1.613334  | -0.051781 |
| 11 | 6 | 0 | 0.725630  | -1.566293 | -0.114227 |
| 12 | 6 | 0 | -1.352726 | -0.723459 | -0.405240 |
| 13 | 6 | 0 | -0.847085 | 0.589730  | -0.428505 |
| 14 | 6 | 0 | 0.490357  | 0.886976  | -0.282986 |
| 15 | 7 | 0 | 1.660600  | -2.482879 | 0.053779  |
| 16 | 7 | 0 | 1.233406  | -0.249234 | -0.131588 |
| 17 | 7 | 0 | -0.589090 | -1.786966 | -0.258667 |
| 18 | 6 | 0 | -2.816853 | -1.032286 | -0.582520 |
| 19 | 8 | 0 | -3.268702 | -1.568174 | -1.562268 |
| 20 | 8 | 0 | -3.522422 | -0.667373 | 0.479286  |
| 21 | 6 | 0 | -4.944533 | -0.912155 | 0.417199  |
| 22 | 6 | 0 | -5.544501 | -0.426902 | 1.710125  |



|    |    |   |           |           |           |
|----|----|---|-----------|-----------|-----------|
| 23 | 1  | 0 | -5.105113 | -1.982222 | 0.265116  |
| 24 | 1  | 0 | -5.347640 | -0.381233 | -0.448850 |
| 25 | 1  | 0 | -6.623600 | -0.598272 | 1.698767  |
| 26 | 1  | 0 | -5.120814 | -0.963139 | 2.562398  |
| 27 | 1  | 0 | -5.367919 | 0.642570  | 1.845809  |
| 28 | 17 | 0 | -1.977957 | 1.919296  | -0.699440 |
| 29 | 6  | 0 | 1.134208  | 3.154218  | 0.271813  |
| 30 | 8  | 0 | 1.708733  | 3.497524  | -0.688134 |
| 31 | 8  | 0 | 0.652173  | 3.169335  | 1.337602  |

### P1-COOH

|    |    |   |           |           |           |
|----|----|---|-----------|-----------|-----------|
| 1  | 6  | 0 | 4.877264  | 0.042694  | 0.917819  |
| 2  | 6  | 0 | 5.152575  | -1.298262 | 0.683565  |
| 3  | 6  | 0 | 4.159994  | -2.142307 | 0.199113  |
| 4  | 6  | 0 | 2.885356  | -1.597712 | -0.045655 |
| 5  | 6  | 0 | 2.638112  | -0.215165 | 0.159370  |
| 6  | 6  | 0 | 3.604189  | 0.615322  | 0.656524  |
| 7  | 1  | 0 | 5.655655  | 0.690088  | 1.304306  |
| 8  | 1  | 0 | 6.142012  | -1.687607 | 0.889794  |
| 9  | 1  | 0 | 4.331435  | -3.199231 | 0.034047  |
| 10 | 1  | 0 | 3.444501  | 1.669292  | 0.823157  |
| 11 | 6  | 0 | 0.795081  | -1.318521 | -0.451277 |
| 12 | 6  | 0 | -1.346641 | -0.595043 | -0.449247 |
| 13 | 6  | 0 | -0.952082 | 0.704593  | -0.184431 |
| 14 | 6  | 0 | 0.430209  | 1.046146  | -0.150793 |
| 15 | 7  | 0 | 1.780754  | -2.249740 | -0.435325 |
| 16 | 7  | 0 | 1.265102  | -0.062307 | -0.168603 |
| 17 | 7  | 0 | -0.484067 | -1.607031 | -0.669257 |
| 18 | 6  | 0 | -2.785350 | -1.007837 | -0.602431 |
| 19 | 8  | 0 | -3.191894 | -1.571663 | -1.585113 |
| 20 | 8  | 0 | -3.504853 | -0.722329 | 0.470538  |
| 21 | 6  | 0 | -4.905312 | -1.080207 | 0.415800  |
| 22 | 6  | 0 | -5.525836 | -0.681580 | 1.727937  |
| 23 | 1  | 0 | -4.977999 | -2.155031 | 0.234252  |
| 24 | 1  | 0 | -5.358350 | -0.559411 | -0.431233 |
| 25 | 1  | 0 | -6.587032 | -0.941634 | 1.721505  |
| 26 | 1  | 0 | -5.049441 | -1.204881 | 2.560059  |
| 27 | 1  | 0 | -5.436952 | 0.394606  | 1.892466  |
| 28 | 17 | 0 | -2.159753 | 1.939589  | -0.002861 |
| 29 | 6  | 0 | 1.047658  | 2.362651  | -0.354069 |
| 30 | 8  | 0 | 2.159322  | 2.481632  | -0.828705 |
| 31 | 8  | 0 | 0.371248  | 3.462291  | -0.001055 |
| 32 | 1  | 0 | -0.502448 | 3.246262  | 0.353894  |

## TS3

|    |    |   |           |           |           |
|----|----|---|-----------|-----------|-----------|
| 1  | 6  | 0 | 4.930369  | -0.088734 | 0.015339  |
| 2  | 6  | 0 | 5.173497  | -1.450460 | 0.271397  |
| 3  | 6  | 0 | 4.138620  | -2.360046 | 0.369823  |
| 4  | 6  | 0 | 2.827763  | -1.891494 | 0.213801  |
| 5  | 6  | 0 | 2.600498  | -0.516369 | -0.020063 |
| 6  | 6  | 0 | 3.644143  | 0.398374  | -0.137682 |
| 7  | 1  | 0 | 5.768327  | 0.594638  | -0.067244 |
| 8  | 1  | 0 | 6.197480  | -1.790480 | 0.385361  |
| 9  | 1  | 0 | 4.320258  | -3.413186 | 0.553001  |
| 10 | 1  | 0 | 3.467668  | 1.447185  | -0.326686 |
| 11 | 6  | 0 | 0.720169  | -1.715376 | 0.009186  |
| 12 | 6  | 0 | -1.388471 | -0.957093 | -0.341895 |
| 13 | 6  | 0 | -0.903855 | 0.363513  | -0.496218 |
| 14 | 6  | 0 | 0.426298  | 0.686541  | -0.380543 |
| 15 | 7  | 0 | 1.659234  | -2.605431 | 0.230740  |
| 16 | 7  | 0 | 1.223043  | -0.397282 | -0.138653 |
| 17 | 7  | 0 | -0.593052 | -1.966306 | -0.094760 |
| 18 | 6  | 0 | -2.845615 | -1.326661 | -0.474145 |
| 19 | 8  | 0 | -3.253878 | -2.097106 | -1.303102 |
| 20 | 8  | 0 | -3.581803 | -0.726548 | 0.447298  |
| 21 | 6  | 0 | -4.999983 | -1.010060 | 0.418687  |
| 22 | 6  | 0 | -5.634308 | -0.265125 | 1.562491  |
| 23 | 1  | 0 | -5.136080 | -2.090584 | 0.503502  |
| 24 | 1  | 0 | -5.391965 | -0.691397 | -0.550281 |
| 25 | 1  | 0 | -6.709706 | -0.458202 | 1.569485  |
| 26 | 1  | 0 | -5.220603 | -0.592832 | 2.518862  |
| 27 | 1  | 0 | -5.479291 | 0.811543  | 1.462921  |
| 28 | 17 | 0 | -2.042140 | 1.639811  | -0.918686 |
| 29 | 6  | 0 | 0.949665  | 2.726238  | 0.575895  |
| 30 | 8  | 0 | 2.001990  | 2.674772  | 1.092818  |
| 31 | 8  | 0 | -0.212996 | 3.026280  | 1.052038  |
| 32 | 1  | 0 | -0.925981 | 2.895238  | 0.395528  |
| 33 | 8  | 0 | 0.951495  | 3.212890  | -1.008243 |
| 34 | 1  | 0 | 0.934762  | 2.269813  | -1.343607 |
| 35 | 1  | 0 | 1.795749  | 3.642814  | -1.227380 |

---
